# Supplementary material for: Increasing Healthy Food Access for Low-Income Communities: Protocol of the Healthy Community Stores Case Study Project
Source: MDPI journal article supplement (doi:10.3390/ijerph19020690), 2022-01-08
Supplement: s1 [file s1]

## **Case Study Report Overview**

General Format:

- A. Single spaced, plus appendices
- B. Relevant quotations embedded throughout (indented if >1 sentence)
- C. Integration of data sources (qual and quant) within each section (also including lay press articles, photos)
- D. Use of tables/figures in common formats → to be discussed

## **Report Outline**

- 1) Executive Summary
- 2) Introduction
  - a) Store Setting
    - i) Physical, social, cultural, historical context of the store
      - (1) Organizational details (owner/manager background, staff composition)
      - (2) Description of surrounding community
    - ii) Economic context (e.g., business model, funding sources)
  - b) Mission of the store (e.g., health focus)
- 3) Store Operations (prior to the events of 2020)
  - a) Food stocking and sales
    - i) Decision-making process
    - ii) Sourcing strategies
    - iii) Pricing strategies
  - b) Community engagement
    - i) Customer demographic
    - ii) Customer shopping experience
    - iii) Outreach/marketing strategies
- 4) Regional impact of events of 2020
  - a) Description of the events that have impacted the store's region
  - b) How these events affect the store
- 5) Store operations (2020 – present) *attention to patterns and practices that differ from prior to 2020*
  - a) Overview of operational changes that occurred in store (e.g., staffing, hours, layout, safety, home delivery; etc.)
  - b) Overview of changes in sourcing/procurement and pricing
    - i) *Includes findings from adapted NEMS-S assessment and sales assessment tool*

- c) Overview of changes with community engagement
  - i) Customer demographic
  - ii) Customer shopping experience
  - iii) Outreach/marketing strategies
- d) Key partners/stakeholders that supported the store's adaptations and their involvement  
*[need to decide if this can be integrated into section E. or should have a separate section]*
- 6) Lessons learned
  - a) Successes – key adaptations that were successful
  - b) Challenges – adaptations that did not go well; areas in which they need additional support and resources
- 7) Future Directions
  - a) Outlook for the food retailer: struggling/expanding?
    - i) Anticipated challenges
  - b) Future plans (e.g., going online, etc.)
- 8) Implications
  - a) Retailer implications: how can these findings be used to inform the practices of similar food retailers looking to adapt in this setting or others?
  - b) Policy implications: what would keep this store from functioning to its full extent?
